# Supplementary material for: Reproducible shape control of single-crystal SnO micro particles
Source: Royal Society of Chemistry journal article supplement (doi:10.1039/c5ra25676c), 2016-01-01
Supplement: c5ra25676c1.pdf [file c5ra25676c1.pdf]

## Supporting information

for

### Reproducible Shape Control of Single-Crystal SnO Micro Particles

*Mai Thanh Nguyen, Hiroaki Shirai, Chondanai Tiankanon, Hiroki Tsukamoto, Yohei Ishida and Tetsu Yonezawa\**

Division of Materials Science and Engineering, Faculty of Engineering, Hokkaido University,  
Kita 13 Nishi 8, Sapporo, Hokkaido 060-8628, Japan

Corresponding author. Email: tetsu@eng.hokudai.ac.jp

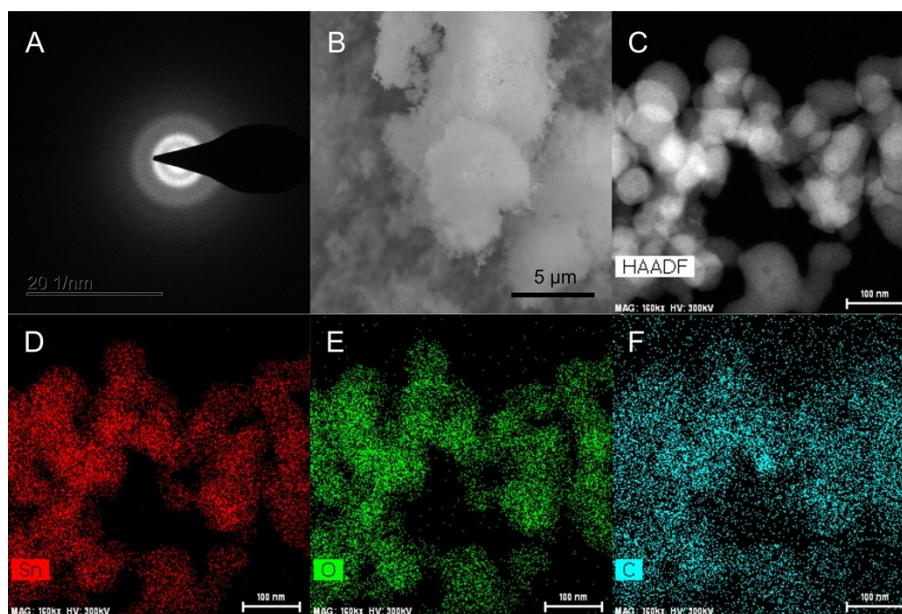

**Figure S1.** (A) SAED pattern, (B) SEM image, (c) HAADF image and (D-F) EDX elemental mappings for Sn L, O K, and C K of the particles synthesized using only OD at 200 °C.

**Table S1.** Crystallite size and strain estimation for SnO particles from the XRD peak broadening

| OAM vol% | Crystallite size (nm) | Strain (%) |
|----------|-----------------------|------------|
| 100      | 128                   | 0.30       |
| 75       | 120                   | 0.25       |
| 50       | 134                   | 0.25       |
| 36       | 141                   | 0.25       |
| 30       | 133                   | 0.24       |
| 25       | 116                   | 0.19       |
| 20       | 56                    | 0.35       |
| 9        | 59                    | 0.41       |
| 1        | 47                    | 0.44       |

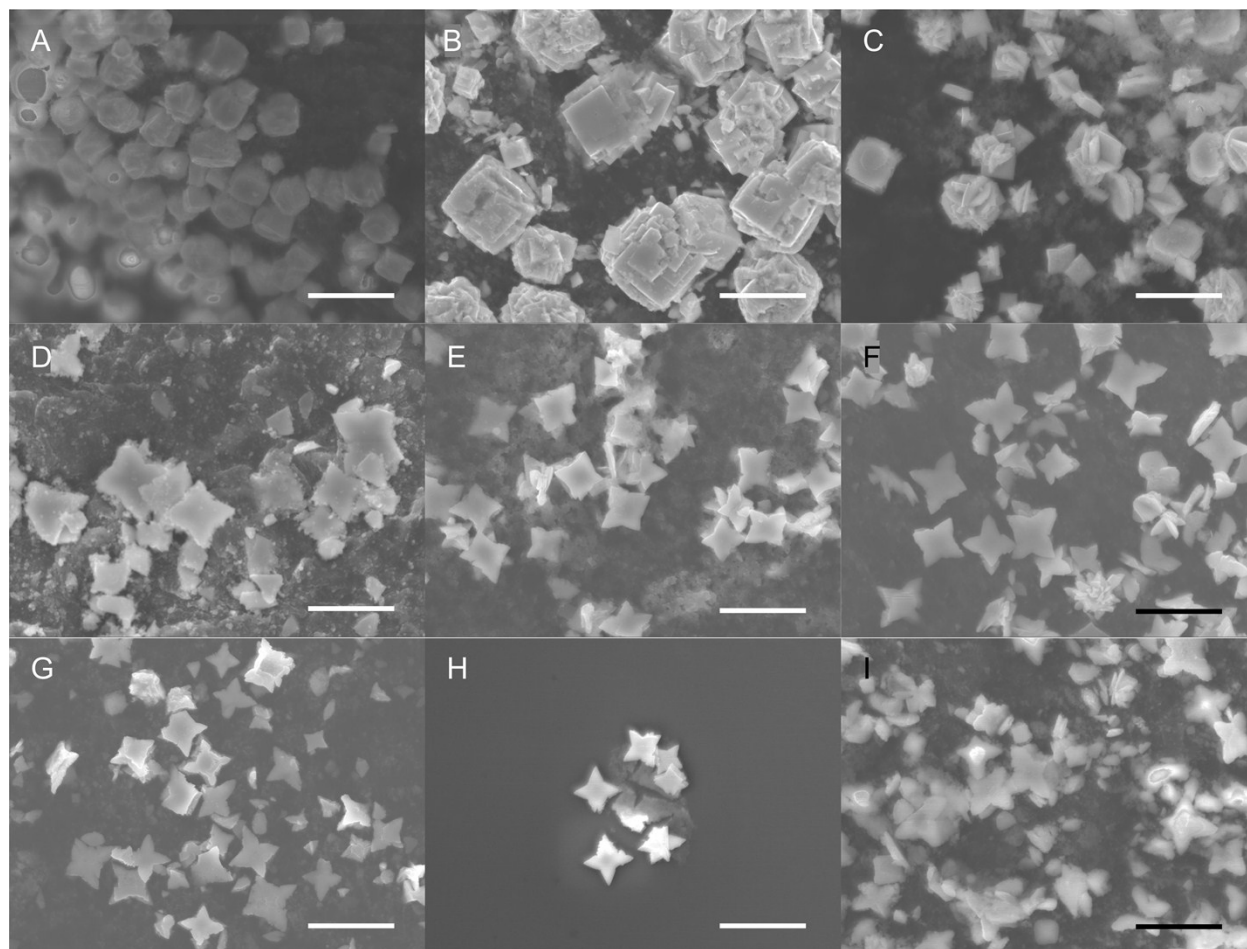

**Figure S2.** (A-I) SEM images of the SnO particles obtained using OAM in concentrations of 1, 9, 20, 25, 30, 36, 50, 75, and 100 vol%, respectively. All the scale bars represent 5  $\mu\text{m}$ .

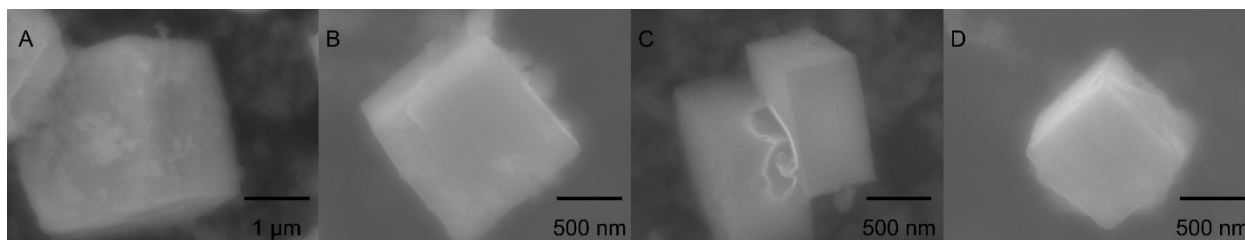

**Figure S3.** SEM images of SnO particles synthesized using 9 vol% OAM and same total reaction volume, and in different input amounts of Sn(acac)<sub>2</sub>: (A) 0.76, (B, C) 0.38, and (D) 0.19 mmol. The input amount of Sn(acac)<sub>2</sub> of 1.52 mmol is used in the standard case shown in the main text.

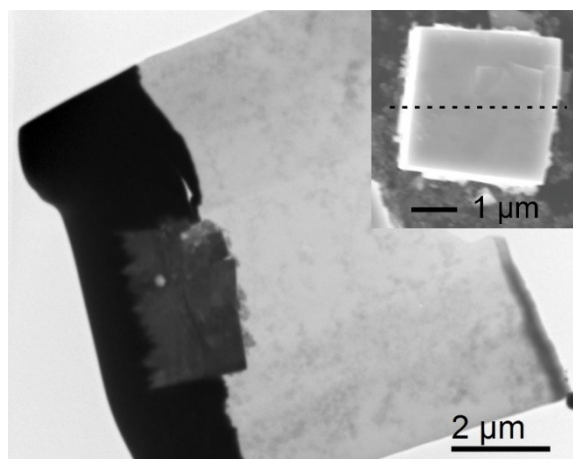

**Figure S4.** Cross sectional TEM image of SnO particles synthesized using 9 vol% OAM after FIB processing along the top-down direction: SnO is sandwiched between the carbon tape (grey) and the W coating layer (black); the inset shows the top view image of the cubic particle before W deposition, and the FIB cutting is along the dash line.

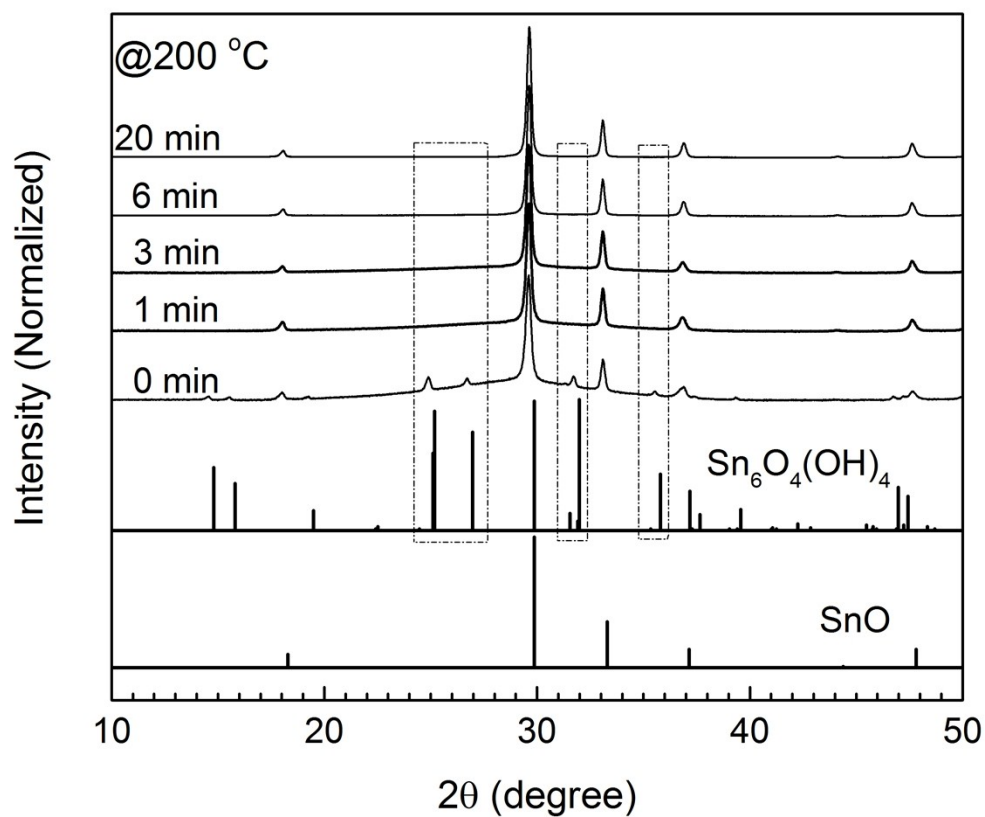

**Figure S5.** XRD patterns of the obtained particles synthesized using 36 vol% OAM at 200 °C after various reaction time: 0, 1, 3, 6, and 20 min. Reference patterns for tetragonal SnO (PDF No. 06-0395) and tetragonal Sn<sub>6</sub>O<sub>4</sub>(OH)<sub>4</sub> (PDF No. 046-1486) are given. The dashed rectangular windows are used for visual guide of some areas in the patterns distinguishable for only Sn<sub>6</sub>O<sub>4</sub>(OH)<sub>4</sub> peaks.

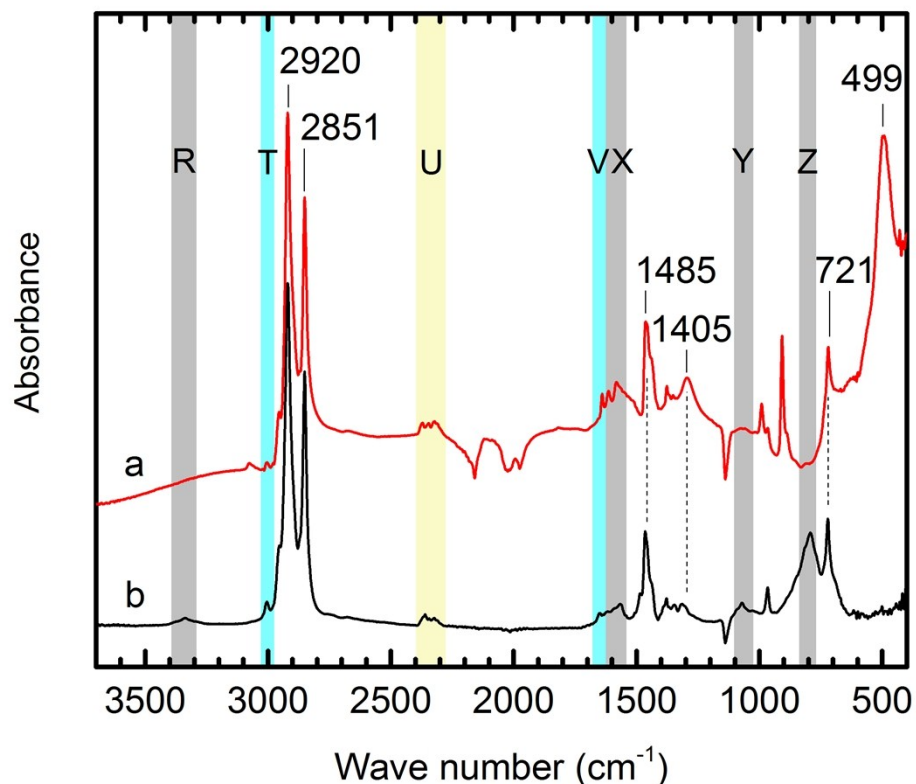

**Figure S6.** FT-IR spectrum of (a) purified SnO particles synthesized using 36 vol% OAM and (b) only OAM. The assignment of peaks and bands is given in Table S2.

**Table S2.** Infrared vibrational assignment for the FT-IR spectra in Figure S6

| Peak/band ID | Frequency     | Vibrational mode                                 | SnO-OAM              | Only OAM      |
|--------------|---------------|--------------------------------------------------|----------------------|---------------|
|              | 2920 and 2851 | $\nu_{as}(\text{C-H})$ and $\nu_s(\text{C-H})$   | strong, sharp        | strong, sharp |
|              | 1485-1405     | $\delta(-\text{CH}_3)$                           | medium               | strong-weak   |
|              | 721           | $\delta(\text{C-C})$                             | medium               | medium        |
|              | 499           | $\nu(\text{Sn-O})$                               | strong               | none          |
| R            | 3300-3360     | $\nu_{as}(\text{NH}_2)$ and $\nu_s(\text{NH}_2)$ | very weak            | weak          |
| X            | 1550-1620     | $\delta(\text{NH}_2)$                            | medium               | medium        |
| Z            | 790-810       | $\delta(\text{NH}_2)$                            | weak                 | strong        |
| Y            | 1060-1090     | $\delta(\text{C-N})$ in amine                    | weak                 | medium        |
| T            | 3003-3006     | $\nu(\text{=C-H})$                               | weak                 | medium        |
| V            | 1640-1660     | $\nu(\text{-C=C-})$                              | medium               | medium        |
| U*           | 2320-2400     | $\nu(\text{O=C=O})$                              | From the environment |               |

$\nu$ ,  $\nu_{as}$ ,  $\nu_s$ ,  $\delta$  are stretching, as-symmetric stretching, symmetric stretching and bending vibrations, respectively.

The peaks located between Y and Z bands may belong to the stretching vibration of trans(-CH=). A band at 1000 cm<sup>-1</sup> is an un-assigned band, this presents in FT-IR spectra of all SnO samples.

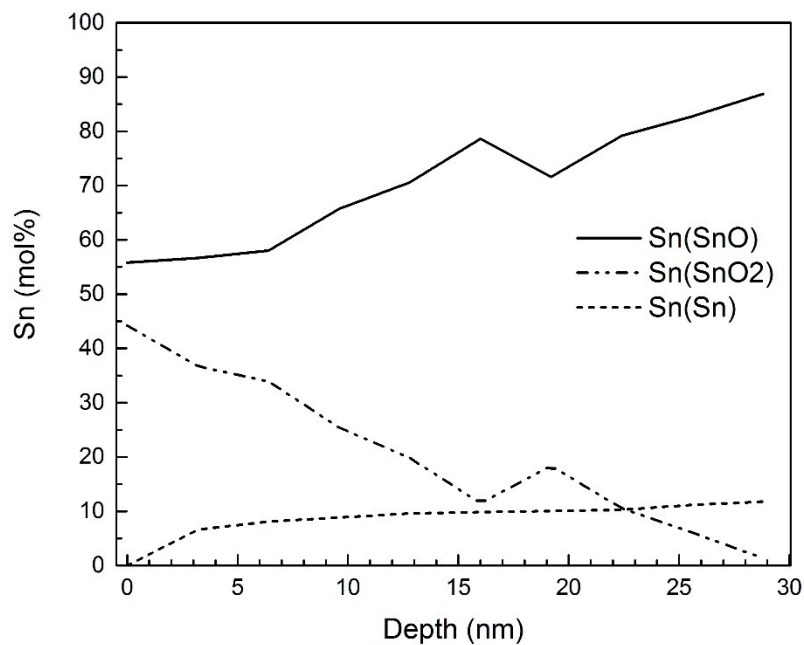

**Figure S7.** AES depth profile of SnO particles synthesized using 30 vol% OAM. Depth profile was collected using Ar etching with etching rate of 3.2 nm/min. The mol% of Sn in SnO, SnO<sub>2</sub>, and metallic Sn were plotted using solid, dashed, and dash-dot-dot curves, respectively.

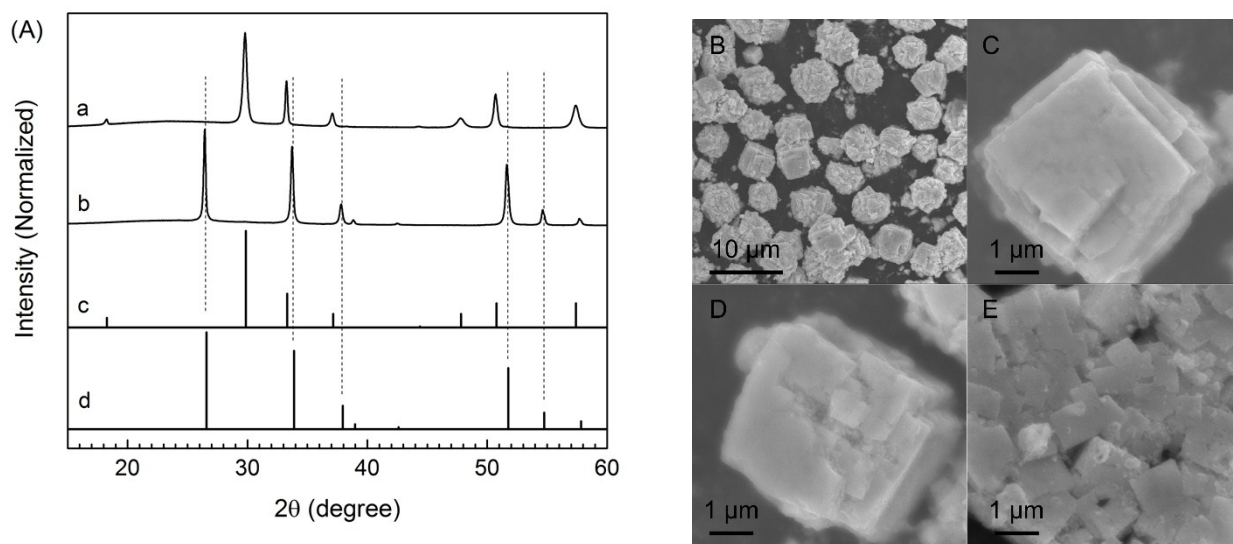

**Figure S8.** (A) XRD patterns of (a) the as-synthesized SnO particles using 9 vol% OAM, (b) resulting samples after annealing in the air at 700 °C for 2 h, and reference patterns for (c) tetragonal SnO (PDF No. 06-0395), and (d) tetragonal SnO<sub>2</sub> (PDF No. 021-1250) respectively. (B-D) Corresponding SEM images of the annealed particles. The dash lines, which marked some main peak positions of tetragonal SnO<sub>2</sub> were used to guide the eyes.

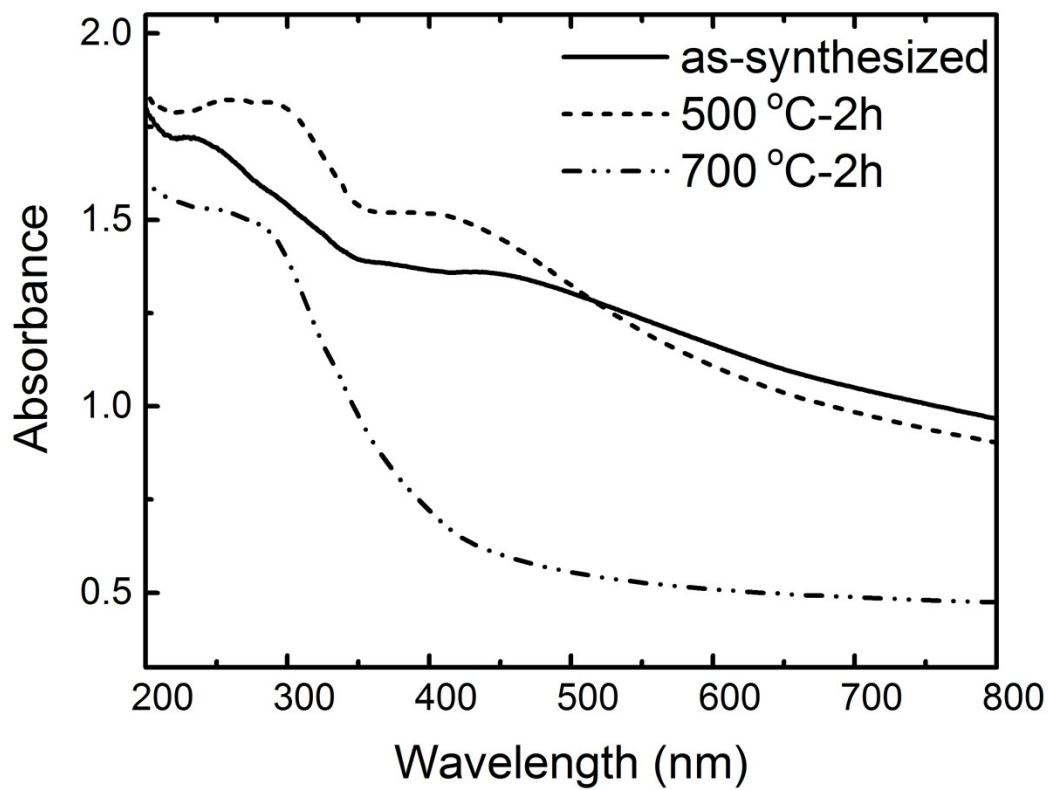

**Figure S9.** Absorption spectrum of the SnO particles synthesized using 75 vol% OAM at room temperature (solid curve) and those obtained after annealing at 500 °C (dash curve) and 700 °C for 2 h (dash-dot-dot curve).
